# Supplementary material for: The use of IVF/ICSI and risk of postpartum hemorrhage: A retrospective cohort study of 153,765 women in China
Source: PubMed Central journal article supplement (PMC10071037; doi:10.3389/fpubh.2023.1016457), 2023-03-21
Supplement: Data_Sheet_1.pdf [file Data_Sheet_1.pdf]

**Table S1. Adjusted associations between the use of IVF/ICSI and the amount of postpartum blood loss or risk of PPH among women with no pregnancy complications.**

|                       | Effect estimates and 95% CI |                             |
|-----------------------|-----------------------------|-----------------------------|
|                       | Postpartum blood loss (ml)  | Postpartum hemorrhage (PPH) |
| Natural conception    | 0 (Reference)               | 1.00 (Reference)            |
| Conceived by IVF/ICSI | 46.4 (42.0-50.8) **         | 3.0 (2.5-3.5) **            |

<sup>a</sup> Models adjusted for maternal age at delivery, parity, gravidity, intra-amniotic infection, mode of delivery, prolonged second stage of labor, gestational age at delivery, newborn birth weight and placental abnormality.

\*\*  $p < 0.01$ .

**Table S2. Adjusted associations between the use of IVF/ICSI and the amount of postpartum blood loss or risk of PPH among women with no placental abnormality.**

|                       | Effect estimates and 95% CI |                             |
|-----------------------|-----------------------------|-----------------------------|
|                       | Postpartum blood loss (ml)  | Postpartum hemorrhage (PPH) |
| Natural conception    | 0 (Reference)               | 1.00 (Reference)            |
| Conceived by IVF/ICSI | 42.9 (39.5-46.3) **         | 3.1 (2.6-3.7) **            |

<sup>a</sup> Models adjusted for maternal age at delivery, parity, gravidity, pregnancy complications, intra-amniotic infection, mode of delivery, prolonged second stage of labor, gestational age at delivery, newborn birth weight.

\*\*  $p < 0.01$ .
